# Supplementary material for: Impact Analysis of the Interobserver Variability in CBCT-Based Soft-Tissue Matching using TCP/NTCP Models for Prostate Cancer Radiotherapy
Source: Research Square preprint supplement (doi:10.21203/rs.3.rs-1011026/v1), 2021-11-02
Supplement: Supplementary file 1 [file 7051cee90e051eb2fc3699fc.docx]

**Supplementary Material A**

The absolute and relative volume variations of the rectum and bladder. Error bars represent standard deviation.
